# Supplementary material
Source: publisher figshare collection journal article supplement (https://geolsoc.figshare.com/articles/dataset/_/3453818)

## Appendix B. BSE images of the analyzed zircon grains, analysis spots and corresponding oxygen and Hf isotope values measured.

Red numbers indicate  $\delta^{18}\text{O}$  values and yellow numbers measured and corrected  $^{176}\text{Hf}/^{177}\text{Hf}$  ratios. White circles denote the approximate spot size of the SIMS analysis ( $\sim 25\mu\text{m}$ ) and yellow circles LAM-ICP-MS analysis spots ( $\sim 55\mu\text{m}$ ) respectively.

### A118 Nurmaa leucogabbro

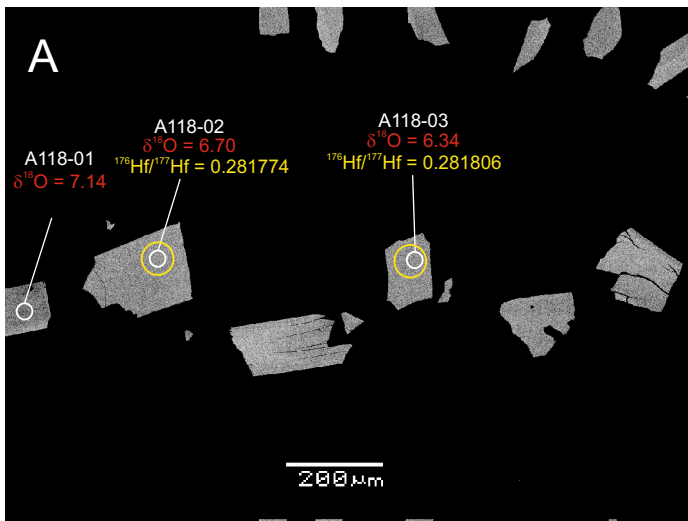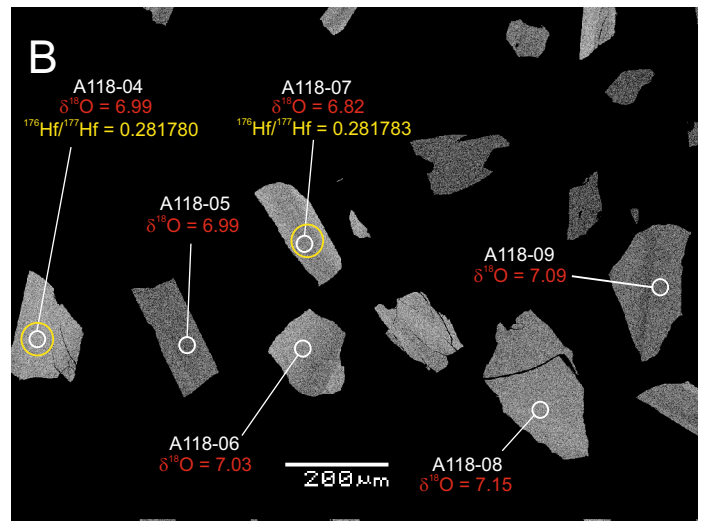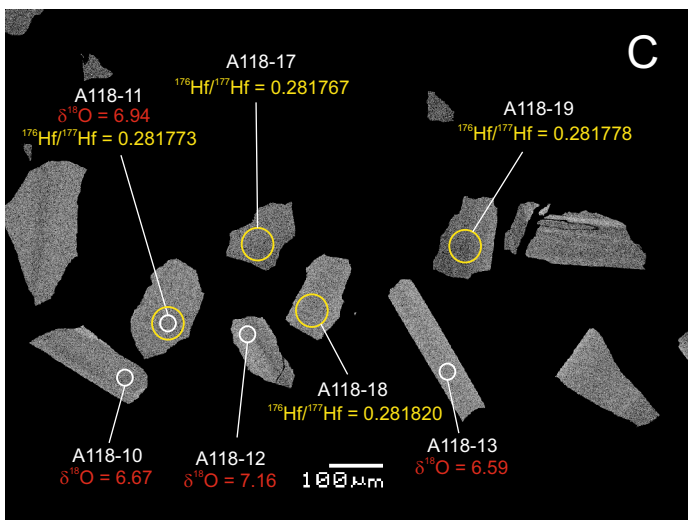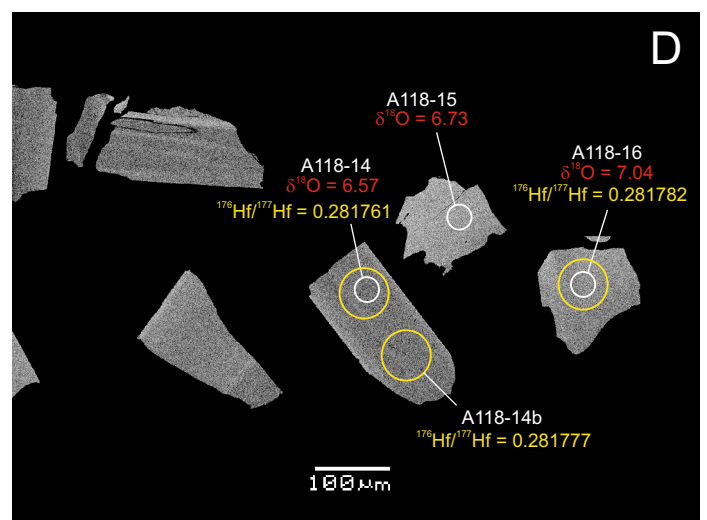

## Appendix B. Continued...

### A1271 Suopelto leucotroctolite

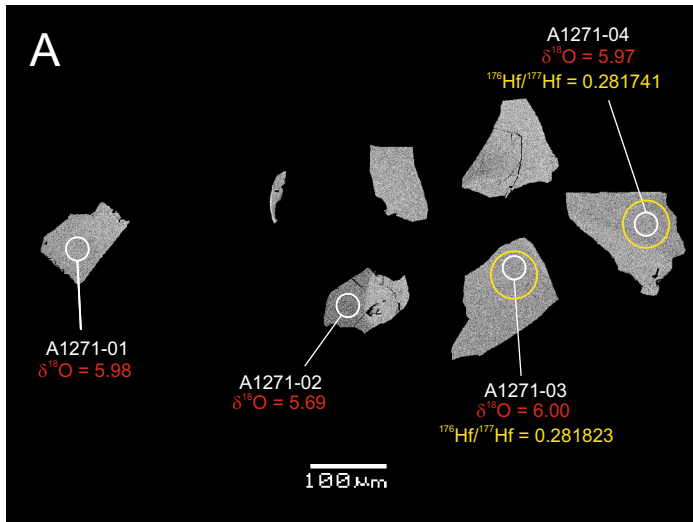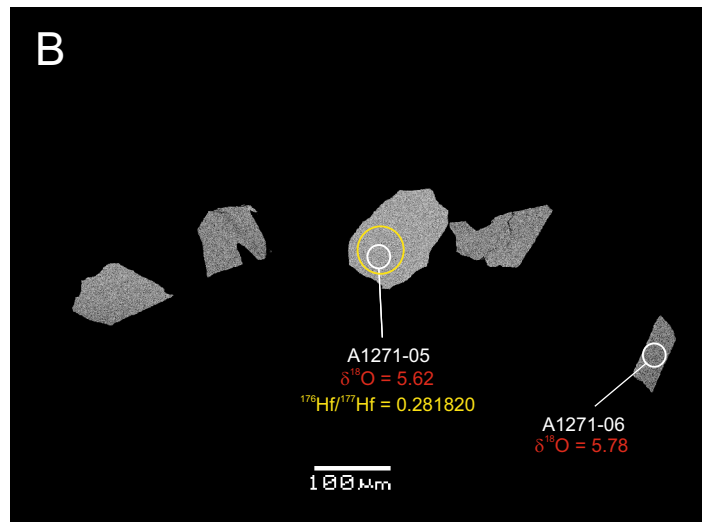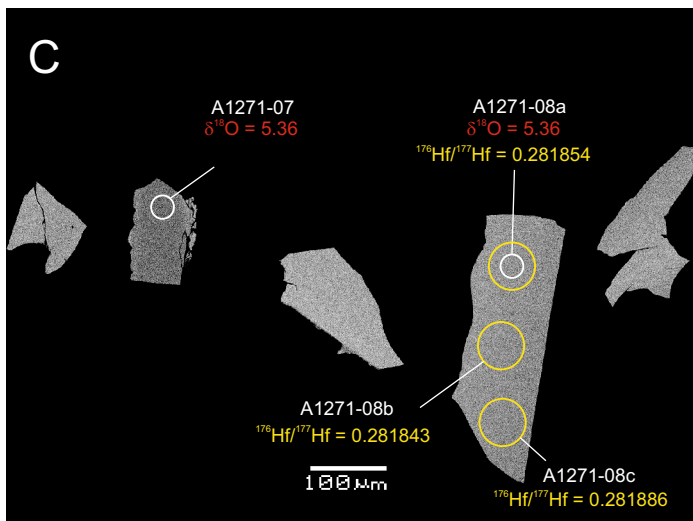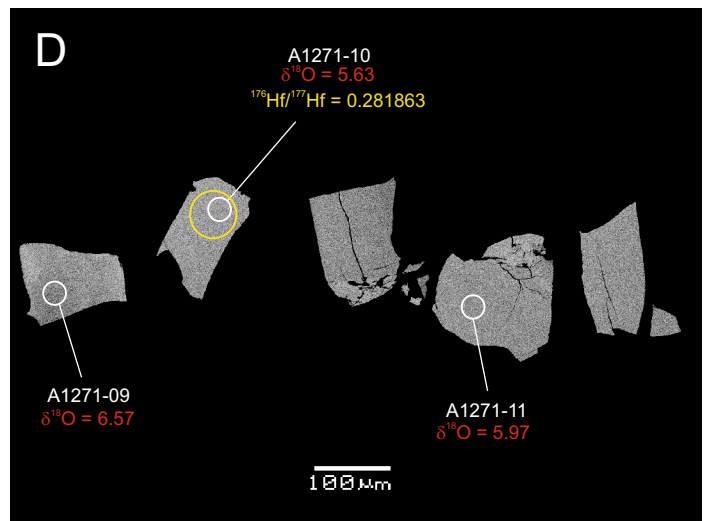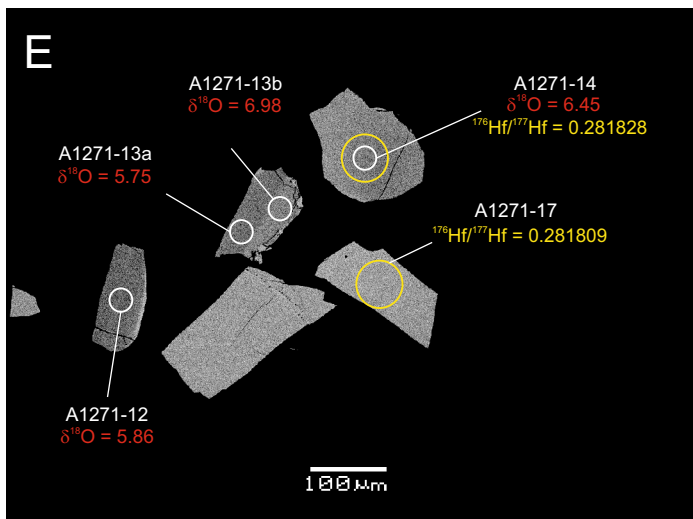

# Appendix B. Continued...

## A1306 Paljakka quartz monzodiorite

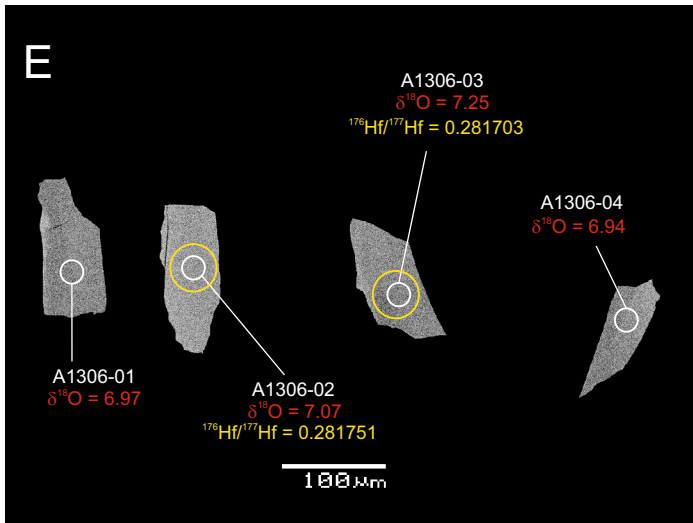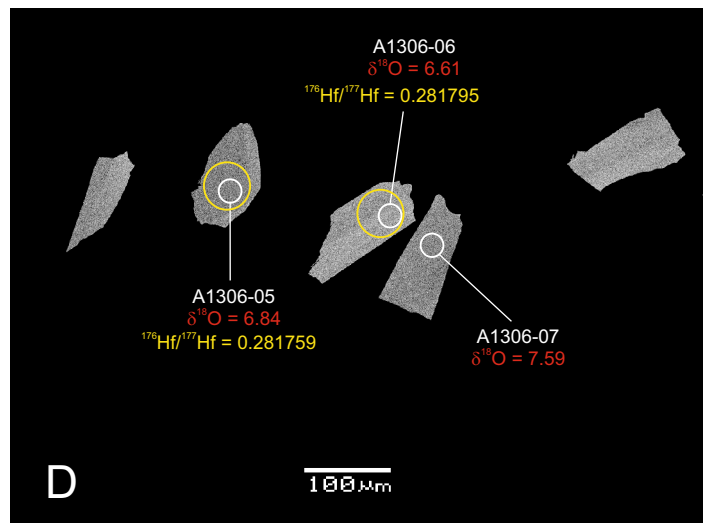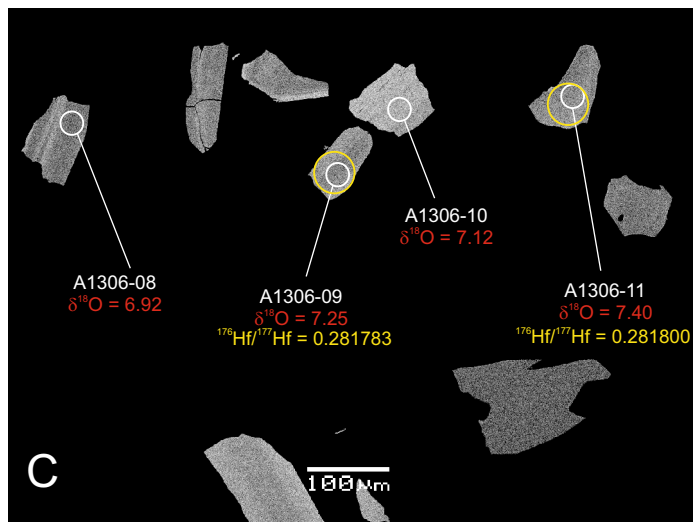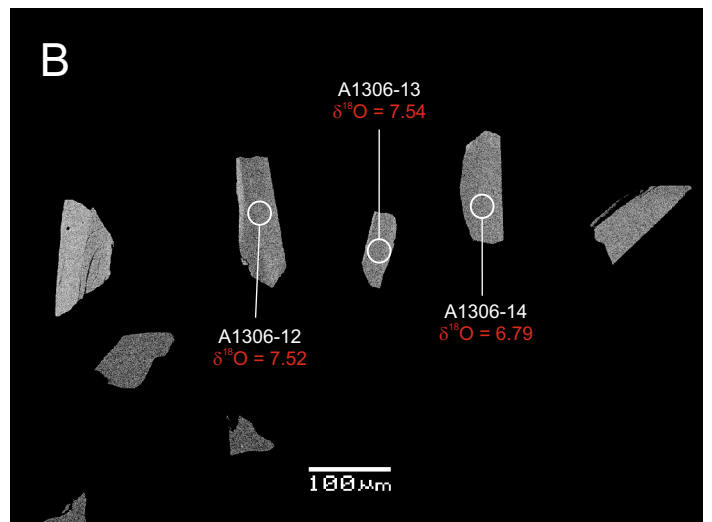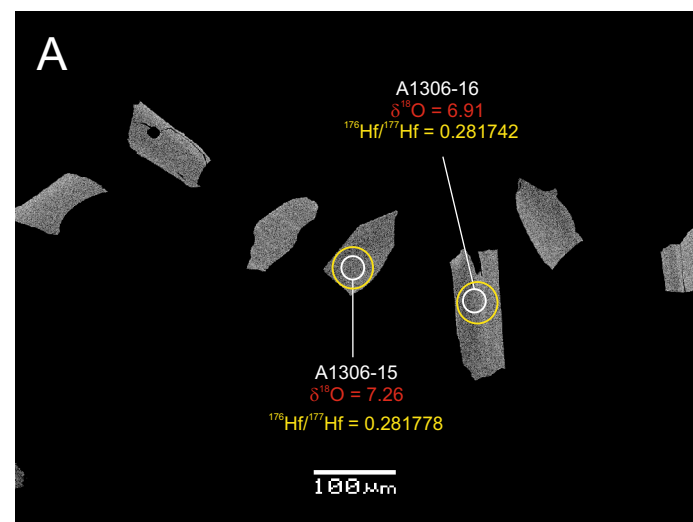

## Appendix B. Continued...

### A1360 lihoonmäki biotite-hornblende granite

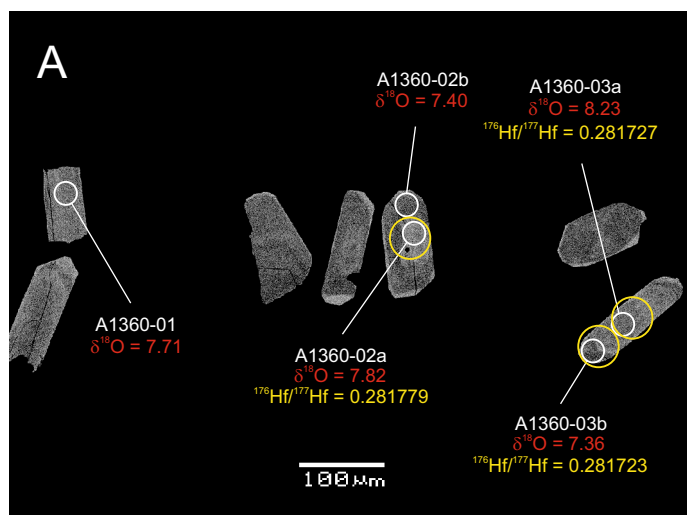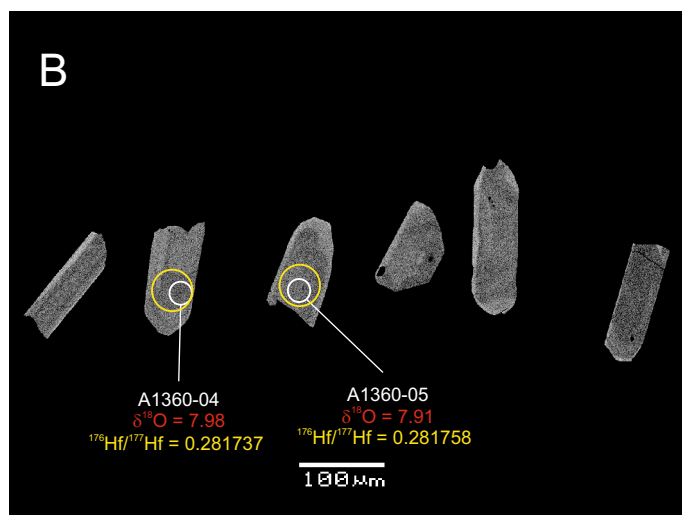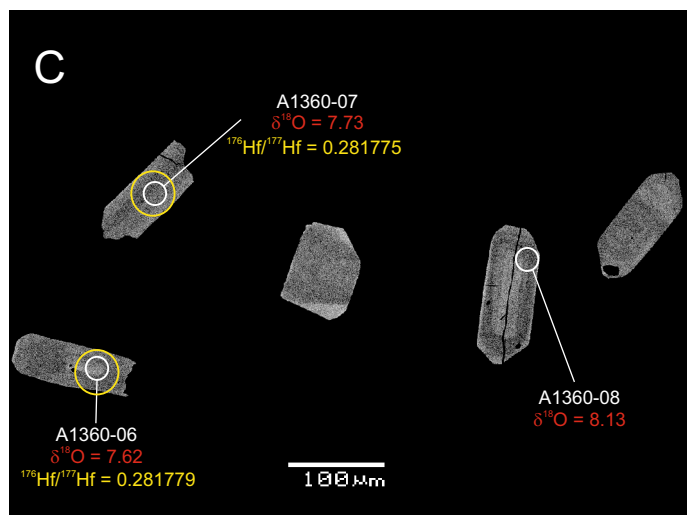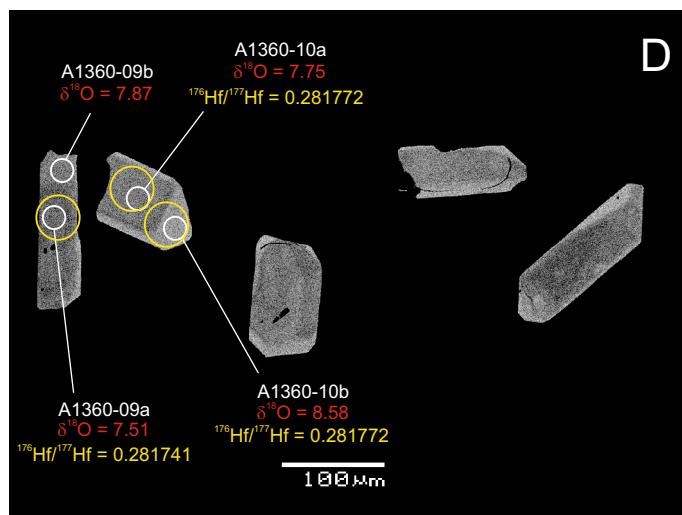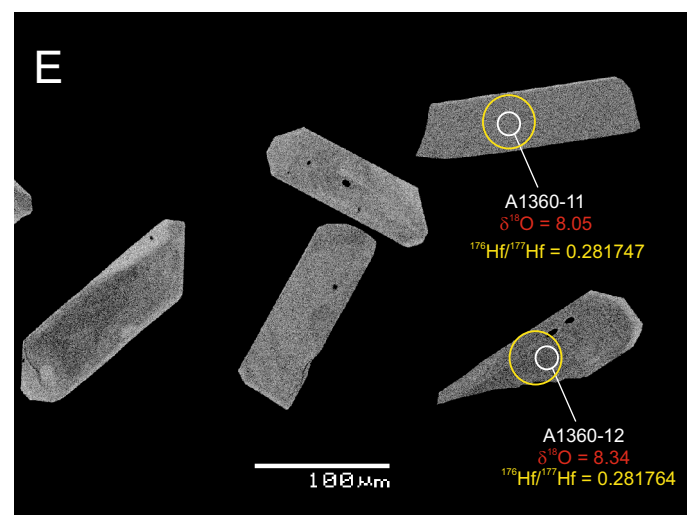

# Appendix B. Continued...

## A1933 Pitkäjärvi anorthosite

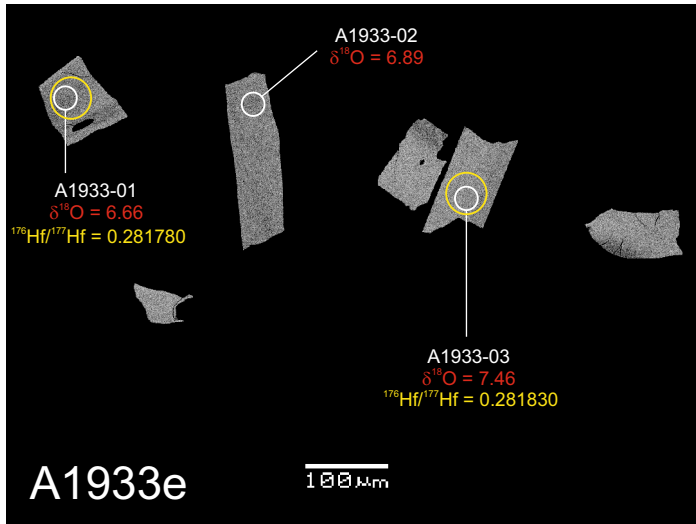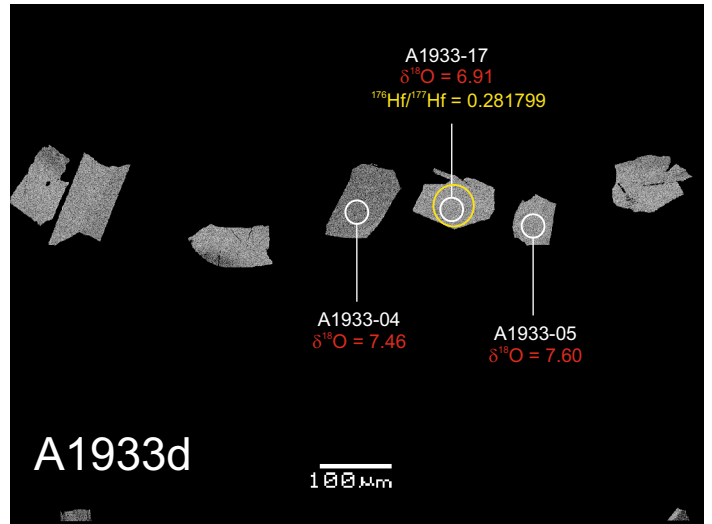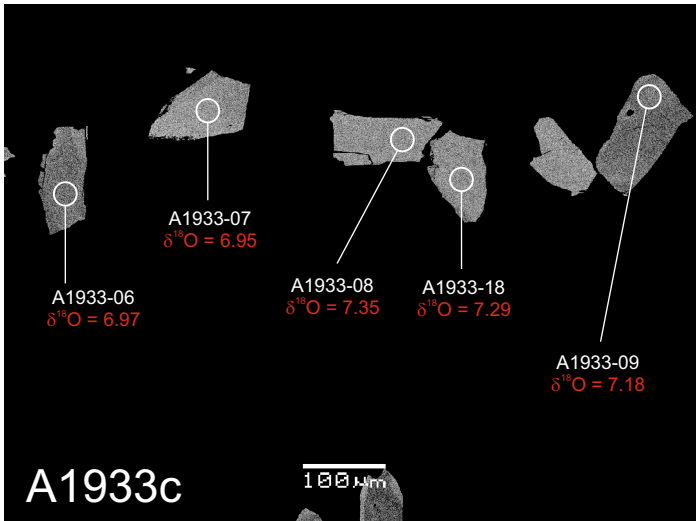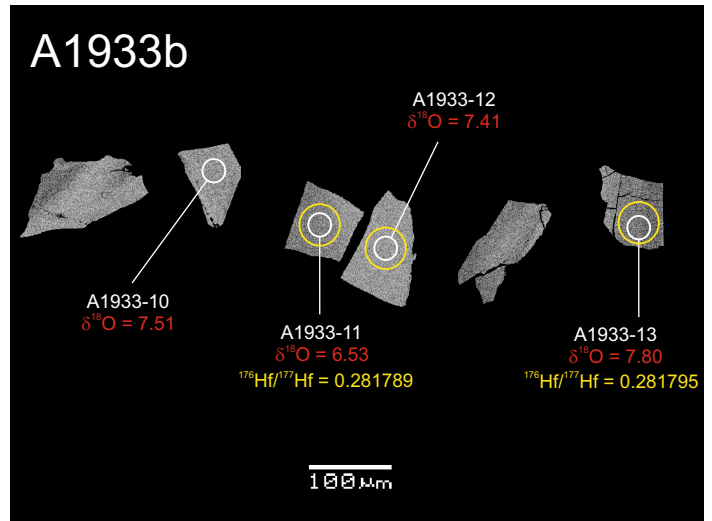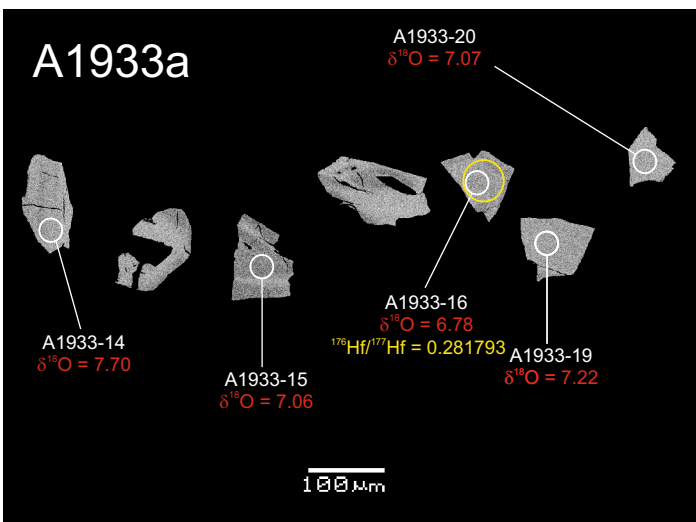

Supplement: Supplementary file 1 [file 1]
