# Supplementary material
Source: publisher figshare collection journal article supplement (https://geolsoc.figshare.com/articles/dataset/_/3453818)
Supplement: Supplementary file 2 [file 1]

**Appendix C. Results of the LAM-ICP-MS Lu-Hf isotope analysis and equivalent SIMS  $\delta^{18}\text{O}$  values for the same grains.**

| Spot     | Age(Ma) <sup>a</sup> | $^{176}\text{Hf}/^{177}\text{Hf}$ | 1SE | $^{176}\text{Lu}/^{177}\text{Hf}$ | 1SE | $^{176}\text{Yb}/^{177}\text{Hf}$ | 1SE | $^{177}\text{Hf}/^{176}\text{Hf}(t)$ | 2SE | $\epsilon_{\text{Hf}}(t)$ | 2SE | Sample ID  | $\delta^{18}\text{O}$ |
|----------|----------------------|-----------------------------------|-----|-----------------------------------|-----|-----------------------------------|-----|--------------------------------------|-----|---------------------------|-----|------------|-----------------------|
| A118-02  | 1640                 | 0.281774 ± 0.000018               |     | 0.00177 ± 0.00009                 |     | 0.0757 ± 0.0023                   |     | 0.281719 ± 0.000036                  |     | -0.8 ± 1.1                |     | n3606ox-02 | 6.7                   |
| A118-03  | 1640                 | 0.281806 ± 0.000017               |     | 0.00110 ± 0.00001                 |     | 0.0491 ± 0.0005                   |     | 0.281772 ± 0.000034                  |     | 1.1 ± 1.2                 |     | n3606ox-03 | 6.3                   |
| A118-04  | 1640                 | 0.281780 ± 0.000014               |     | 0.00082 ± 0.00005                 |     | 0.0363 ± 0.0033                   |     | 0.281754 ± 0.000028                  |     | 0.5 ± 0.9                 |     | n3606ox-04 | 7.0                   |
| A118-07  | 1640                 | 0.281783 ± 0.000015               |     | 0.00088 ± 0.00006                 |     | 0.0319 ± 0.0009                   |     | 0.281756 ± 0.000030                  |     | 0.5 ± 0.9                 |     | n3606ox-07 | 6.8                   |
| A118-11  | 1640                 | 0.281773 ± 0.000015               |     | 0.00039 ± 0.00002                 |     | 0.0156 ± 0.0003                   |     | 0.281761 ± 0.000030                  |     | 0.7 ± 1.0                 |     | n3606ox-11 | 6.9                   |
| A118-14  | 1640                 | 0.281761 ± 0.000014               |     | 0.00090 ± 0.00002                 |     | 0.0389 ± 0.0015                   |     | 0.281733 ± 0.000028                  |     | -0.3 ± 1.0                |     | n3606ox-14 | 6.6                   |
| A118-14b | 1640                 | 0.281777 ± 0.000016               |     | 0.00094 ± 0.00001                 |     | 0.0389 ± 0.0004                   |     | 0.281748 ± 0.000032                  |     | 0.3 ± 1.1                 |     | n3606ox-14 | 6.6                   |
| A118-16  | 1640                 | 0.281782 ± 0.000023               |     | 0.00155 ± 0.00003                 |     | 0.0674 ± 0.0014                   |     | 0.281734 ± 0.000046                  |     | -0.2 ± 1.6                |     | n3606ox-16 | 7.0                   |
| A118-17  | 1640                 | 0.281767 ± 0.000012               |     | 0.00072 ± 0.00001                 |     | 0.0314 ± 0.0003                   |     | 0.281745 ± 0.000024                  |     | 0.2 ± 0.8                 |     |            |                       |
| A118-18  | 1640                 | 0.281820 ± 0.000014               |     | 0.00127 ± 0.00000                 |     | 0.0548 ± 0.0007                   |     | 0.281780 ± 0.000028                  |     | 1.4 ± 1.0                 |     |            |                       |
| A118-19  | 1640                 | 0.281778 ± 0.000013               |     | 0.00058 ± 0.00001                 |     | 0.0253 ± 0.0008                   |     | 0.281760 ± 0.000026                  |     | 0.7 ± 0.9                 |     |            |                       |
| A118-01  |                      |                                   |     |                                   |     |                                   |     |                                      |     |                           |     | n3606ox-01 | 7.1                   |
| A118-05  |                      |                                   |     |                                   |     |                                   |     |                                      |     |                           |     | n3606ox-05 | 7.0                   |
| A118-06  |                      |                                   |     |                                   |     |                                   |     |                                      |     |                           |     | n3606ox-06 | 7.0                   |
| A118-08  |                      |                                   |     |                                   |     |                                   |     |                                      |     |                           |     | n3606ox-08 | 7.1                   |
| A118-09  |                      |                                   |     |                                   |     |                                   |     |                                      |     |                           |     | n3606ox-09 | 7.1                   |
| A118-10  |                      |                                   |     |                                   |     |                                   |     |                                      |     |                           |     | n3606ox-10 | 6.7                   |
| A118-12  |                      |                                   |     |                                   |     |                                   |     |                                      |     |                           |     | n3606ox-12 | 7.2                   |
| A118-13  |                      |                                   |     |                                   |     |                                   |     |                                      |     |                           |     | n3606ox-13 | 6.6                   |
| A118-15  |                      |                                   |     |                                   |     |                                   |     |                                      |     |                           |     | n3606ox-15 | 6.7                   |

<sup>a</sup>Age used in calculation of  $^{176}\text{Hf}/^{177}\text{Hf}(t)$  and  $\epsilon_{\text{Hf}}(t)$  (Alviola *et al.* 1999; Heinonen *et al.* 2010).

| Spot      | Age(Ma) <sup>a</sup> | <sup>176</sup> Hf/ <sup>177</sup> Hf | 1SE | <sup>176</sup> Lu/ <sup>177</sup> Hf | 1SE | <sup>176</sup> Yb/ <sup>177</sup> Hf | 1SE | <sup>177</sup> Hf/ <sup>176</sup> Hf | 2SE | $\epsilon_{\text{Hf}}(t)$ | 2SE | Sample ID   | $\delta^{18}\text{O}$ |
|-----------|----------------------|--------------------------------------|-----|--------------------------------------|-----|--------------------------------------|-----|--------------------------------------|-----|---------------------------|-----|-------------|-----------------------|
| A1271-03  | 1636                 | 0.281823 ± 0.000011                  |     | 0.00133 ± 0.00001                    |     | 0.0604 ± 0.0002                      |     | 0.281782 ± 0.000022                  |     | 1.4 ± 0.8                 |     | n3602ox-03  | 6.0                   |
| A1271-04  | 1636                 | 0.281741 ± 0.000015                  |     | 0.00097 ± 0.00005                    |     | 0.0397 ± 0.0031                      |     | 0.281711 ± 0.000030                  |     | -1.1 ± 1.0                |     | n3602ox-04  | 6.0                   |
| A1271-05  | 1636                 | 0.281820 ± 0.000018                  |     | 0.00268 ± 0.00004                    |     | 0.1199 ± 0.0039                      |     | 0.281737 ± 0.000036                  |     | -0.2 ± 1.2                |     | n3602ox-05  | 5.6                   |
| A1271-08a | 1636                 | 0.281854 ± 0.000011                  |     | 0.00156 ± 0.00001                    |     | 0.0729 ± 0.0007                      |     | 0.281806 ± 0.000022                  |     | 2.2 ± 0.8                 |     | n3602ox-08  | 5.4                   |
| A1271-08b | 1636                 | 0.281843 ± 0.000017                  |     | 0.00155 ± 0.00001                    |     | 0.0715 ± 0.0006                      |     | 0.281795 ± 0.000034                  |     | 1.8 ± 1.2                 |     | n3602ox-08  | 5.4                   |
| A1271-08c | 1636                 | 0.281886 ± 0.000018                  |     | 0.00153 ± 0.00001                    |     | 0.0708 ± 0.0006                      |     | 0.281839 ± 0.000036                  |     | 3.4 ± 1.3                 |     | n3602ox-08  | 5.4                   |
| A1271-10  | 1636                 | 0.281863 ± 0.000017                  |     | 0.00175 ± 0.00005                    |     | 0.0822 ± 0.0037                      |     | 0.281809 ± 0.000034                  |     | 2.3 ± 1.1                 |     | n3602ox-10  | 5.6                   |
| A1271-14  | 1636                 | 0.281828 ± 0.000015                  |     | 0.00110 ± 0.00003                    |     | 0.0500 ± 0.0005                      |     | 0.281794 ± 0.000030                  |     | 1.8 ± 1.0                 |     | n3602ox-14  | 6.4                   |
| A1271-17  | 1636                 | 0.281809 ± 0.000018                  |     | 0.00134 ± 0.00002                    |     | 0.0621 ± 0.0002                      |     | 0.281767 ± 0.000036                  |     | 0.9 ± 1.2                 |     |             |                       |
| A1271-01  |                      |                                      |     |                                      |     |                                      |     |                                      |     |                           |     | n3602ox-01  | 6.0                   |
| A1271-02  |                      |                                      |     |                                      |     |                                      |     |                                      |     |                           |     | n3602ox-02  | 5.7                   |
| A1271-06  |                      |                                      |     |                                      |     |                                      |     |                                      |     |                           |     | n3602ox-06  | 5.8                   |
| A1271-07  |                      |                                      |     |                                      |     |                                      |     |                                      |     |                           |     | n3602ox-07  | 5.4                   |
| A1271-09  |                      |                                      |     |                                      |     |                                      |     |                                      |     |                           |     | n3602ox-09  | 6.6                   |
| A1271-11  |                      |                                      |     |                                      |     |                                      |     |                                      |     |                           |     | n3602ox-11  | 6.0                   |
| A1271-12  |                      |                                      |     |                                      |     |                                      |     |                                      |     |                           |     | n3602ox-12  | 5.9                   |
| A1271-13a |                      |                                      |     |                                      |     |                                      |     |                                      |     |                           |     | n3602ox-13a | 7.0                   |
| A1271-13b |                      |                                      |     |                                      |     |                                      |     |                                      |     |                           |     | n3602ox-13b | 5.8                   |

<sup>a</sup>Age used in calculation of <sup>176</sup>Hf/<sup>177</sup>Hf(t) and  $\epsilon_{\text{Hf}}(t)$  (Alviola *et al.* 1999; Heinonen *et al.* 2010).

| Spot     | Age(Ma) <sup>a</sup> | <sup>176</sup> Hf/ <sup>177</sup> Hf | 1SE | <sup>176</sup> Lu/ <sup>177</sup> Hf | 1SE | <sup>176</sup> Yb/ <sup>177</sup> Hf | 1SE | <sup>177</sup> Hf/ <sup>176</sup> Hf(t) | 2SE | ε <sub>Hf</sub> (t) | 2SE | Sample ID  | δ <sup>18</sup> O |
|----------|----------------------|--------------------------------------|-----|--------------------------------------|-----|--------------------------------------|-----|-----------------------------------------|-----|---------------------|-----|------------|-------------------|
| A1933-01 | 1641                 | 0.281780 ± 0.000017                  |     | 0.00028 ± 0.00001                    |     | 0.0138 ± 0.0003                      |     | 0.281771 ± 0.000034                     |     | 1.1 ± 1.2           |     | n3603ox-01 | 6.7               |
| A1933-03 | 1641                 | 0.281830 ± 0.000016                  |     | 0.00112 ± 0.00004                    |     | 0.0477 ± 0.0006                      |     | 0.281795 ± 0.000032                     |     | 2.0 ± 1.0           |     | n3603ox-03 | 7.5               |
| A1933-11 | 1641                 | 0.281789 ± 0.000018                  |     | 0.00077 ± 0.00008                    |     | 0.0350 ± 0.0047                      |     | 0.281765 ± 0.000036                     |     | 0.9 ± 1.1           |     | n3603ox-11 | 6.5               |
| A1933-13 | 1641                 | 0.281795 ± 0.000018                  |     | 0.00077 ± 0.00004                    |     | 0.0326 ± 0.0008                      |     | 0.281771 ± 0.000036                     |     | 1.1 ± 1.2           |     | n3603ox-13 | 7.8               |
| A1933-16 | 1641                 | 0.281793 ± 0.000014                  |     | 0.00021 ± 0.00001                    |     | 0.0086 ± 0.0002                      |     | 0.281787 ± 0.000028                     |     | 1.7 ± 1.0           |     | n3603ox-16 | 6.8               |
| A1933-17 | 1641                 | 0.281799 ± 0.000025                  |     | 0.00127 ± 0.00005                    |     | 0.0616 ± 0.0008                      |     | 0.281760 ± 0.000050                     |     | 0.7 ± 1.7           |     | n3603ox-17 | 6.9               |
| A1933-02 |                      |                                      |     |                                      |     |                                      |     |                                         |     |                     |     | n3603ox-02 | 6.9               |
| A1933-04 |                      |                                      |     |                                      |     |                                      |     |                                         |     |                     |     | n3603ox-04 | 7.5               |
| A1933-05 |                      |                                      |     |                                      |     |                                      |     |                                         |     |                     |     | n3603ox-05 | 7.6               |
| A1933-06 |                      |                                      |     |                                      |     |                                      |     |                                         |     |                     |     | n3603ox-06 | 7.0               |
| A1933-07 |                      |                                      |     |                                      |     |                                      |     |                                         |     |                     |     | n3603ox-07 | 6.9               |
| A1933-08 |                      |                                      |     |                                      |     |                                      |     |                                         |     |                     |     | n3603ox-08 | 7.4               |
| A1933-09 |                      |                                      |     |                                      |     |                                      |     |                                         |     |                     |     | n3603ox-09 | 7.2               |
| A1933-10 |                      |                                      |     |                                      |     |                                      |     |                                         |     |                     |     | n3603ox-10 | 7.5               |
| A1933-12 |                      |                                      |     |                                      |     |                                      |     |                                         |     |                     |     | n3603ox-12 | 7.4               |
| A1933-14 |                      |                                      |     |                                      |     |                                      |     |                                         |     |                     |     | n3603ox-14 | 7.7               |
| A1933-15 |                      |                                      |     |                                      |     |                                      |     |                                         |     |                     |     | n3603ox-15 | 7.1               |
| A1933-18 |                      |                                      |     |                                      |     |                                      |     |                                         |     |                     |     | n3603ox-18 | 7.3               |
| A1933-19 |                      |                                      |     |                                      |     |                                      |     |                                         |     |                     |     | n3603ox-19 | 7.2               |
| A1933-20 |                      |                                      |     |                                      |     |                                      |     |                                         |     |                     |     | n3603ox-20 | 7.1               |

<sup>a</sup>Age used in calculation of <sup>176</sup>Hf/<sup>177</sup>Hf(t) and ε<sub>Hf</sub>(t) (Alviola *et al.* 1999; Heinonen *et al.* 2010).

| Spot     | Age(Ma) <sup>a</sup> | <sup>176</sup> Hf/ <sup>177</sup> Hf | 1SE | <sup>176</sup> Lu/ <sup>177</sup> Hf | 1SE | <sup>176</sup> Yb/ <sup>177</sup> Hf | 1SE | <sup>177</sup> Hf/ <sup>176</sup> Hf(t) | 2SE | $\epsilon_{\text{Hf}}(t)$ | 2SE | Sample ID  | $\delta^{18}\text{O}$ |
|----------|----------------------|--------------------------------------|-----|--------------------------------------|-----|--------------------------------------|-----|-----------------------------------------|-----|---------------------------|-----|------------|-----------------------|
| A1306-02 | 1642                 | 0.281751 ± 0.000026                  |     | 0.00109 ± 0.00009                    |     | 0.0369 ± 0.0025                      |     | 0.281717 ± 0.000052                     |     | -0.8 ± 1.7                |     | n3605ox-02 | 7.1                   |
| A1306-03 | 1642                 | 0.281703 ± 0.000020                  |     | 0.00052 ± 0.00002                    |     | 0.0249 ± 0.0007                      |     | 0.281687 ± 0.000040                     |     | -1.8 ± 1.4                |     | n3605ox-03 | 7.2                   |
| A1306-05 | 1642                 | 0.281759 ± 0.000023                  |     | 0.00085 ± 0.00007                    |     | 0.0312 ± 0.0011                      |     | 0.281733 ± 0.000046                     |     | -0.2 ± 1.5                |     | n3605ox-05 | 6.8                   |
| A1306-06 | 1642                 | 0.281795 ± 0.000020                  |     | 0.00044 ± 0.00000                    |     | 0.0234 ± 0.0006                      |     | 0.281781 ± 0.000040                     |     | 1.5 ± 1.4                 |     | n3605ox-06 | 6.6                   |
| A1306-09 | 1642                 | 0.281783 ± 0.000025                  |     | 0.00160 ± 0.00010                    |     | 0.0562 ± 0.0025                      |     | 0.281733 ± 0.000050                     |     | -0.2 ± 1.6                |     | n3605ox-09 | 7.2                   |
| A1306-11 | 1642                 | 0.281800 ± 0.000019                  |     | 0.00082 ± 0.00003                    |     | 0.0401 ± 0.0007                      |     | 0.281774 ± 0.000038                     |     | 1.3 ± 1.3                 |     | n3605ox-11 | 7.4                   |
| A1306-15 | 1642                 | 0.281778 ± 0.000020                  |     | 0.00066 ± 0.00006                    |     | 0.0329 ± 0.0009                      |     | 0.281757 ± 0.000040                     |     | 0.7 ± 1.3                 |     | n3605ox-15 | 7.3                   |
| A1306-16 | 1642                 | 0.281742 ± 0.000022                  |     | 0.00063 ± 0.00002                    |     | 0.0316 ± 0.0006                      |     | 0.281722 ± 0.000044                     |     | -0.6 ± 1.5                |     | n3605ox-16 | 6.9                   |
| A1306-01 |                      |                                      |     |                                      |     |                                      |     |                                         |     |                           |     | n3605ox-01 | 7.0                   |
| A1306-04 |                      |                                      |     |                                      |     |                                      |     |                                         |     |                           |     | n3605ox-04 | 6.9                   |
| A1306-07 |                      |                                      |     |                                      |     |                                      |     |                                         |     |                           |     | n3605ox-07 | 7.6                   |
| A1306-08 |                      |                                      |     |                                      |     |                                      |     |                                         |     |                           |     | n3605ox-08 | 6.9                   |
| A1306-10 |                      |                                      |     |                                      |     |                                      |     |                                         |     |                           |     | n3605ox-10 | 7.1                   |
| A1306-12 |                      |                                      |     |                                      |     |                                      |     |                                         |     |                           |     | n3605ox-12 | 7.5                   |
| A1306-13 |                      |                                      |     |                                      |     |                                      |     |                                         |     |                           |     | n3605ox-13 | 7.5                   |
| A1306-14 |                      |                                      |     |                                      |     |                                      |     |                                         |     |                           |     | n3605ox-14 | 6.8                   |

<sup>a</sup>Age used in calculation of <sup>176</sup>Hf/<sup>177</sup>Hf(t) and  $\epsilon_{\text{Hf}}(t)$  (Alviola *et al.* 1999; Heinonen *et al.* 2010).

| Spot      | Age(Ma) <sup>a</sup> | <sup>176</sup> Hf/ <sup>177</sup> Hf | 1SE | <sup>176</sup> Lu/ <sup>177</sup> Hf | 1SE | <sup>176</sup> Yb/ <sup>177</sup> Hf | 1SE | <sup>177</sup> Hf/ <sup>176</sup> Hf(t) | 2SE | ε <sub>Hf</sub> (t) | 2SE | Sample ID   | δ <sup>18</sup> O |
|-----------|----------------------|--------------------------------------|-----|--------------------------------------|-----|--------------------------------------|-----|-----------------------------------------|-----|---------------------|-----|-------------|-------------------|
| A1360-02a | 1636                 | 0.281779 ± 0.000021                  |     | 0.00072 ± 0.00001                    |     | 0.0404 ± 0.0011                      |     | 0.281757 ± 0.000042                     |     | 0.5 ± 1.5           |     | n3604ox-02a | 7.8               |
| A1360-03a | 1636                 | 0.281727 ± 0.000016                  |     | 0.00094 ± 0.00005                    |     | 0.0326 ± 0.0012                      |     | 0.281698 ± 0.000032                     |     | -1.6 ± 1.0          |     | n3604ox-03a | 8.2               |
| A1360-03b | 1636                 | 0.281723 ± 0.000016                  |     | 0.00124 ± 0.00002                    |     | 0.0421 ± 0.0012                      |     | 0.281685 ± 0.000032                     |     | -2.1 ± 1.1          |     | n3604ox-03b | 7.4               |
| A1360-04  | 1636                 | 0.281737 ± 0.000021                  |     | 0.00082 ± 0.00003                    |     | 0.0417 ± 0.0014                      |     | 0.281712 ± 0.000042                     |     | -1.1 ± 1.4          |     | n3604ox-04  | 8.0               |
| A1360-05  | 1636                 | 0.281758 ± 0.000016                  |     | 0.00063 ± 0.00004                    |     | 0.0262 ± 0.0004                      |     | 0.281738 ± 0.000032                     |     | -0.2 ± 1.1          |     | n3604ox-05  | 7.9               |
| A1360-06  | 1636                 | 0.281784 ± 0.000014                  |     | 0.00084 ± 0.00005                    |     | 0.0369 ± 0.0011                      |     | 0.281758 ± 0.000028                     |     | 0.5 ± 0.9           |     | n3604ox-06  | 7.6               |
| A1360-07  | 1636                 | 0.281775 ± 0.000018                  |     | 0.00091 ± 0.00006                    |     | 0.0472 ± 0.0014                      |     | 0.281747 ± 0.000036                     |     | 0.1 ± 1.2           |     | n3604ox-07  | 7.7               |
| A1360-09a | 1636                 | 0.281741 ± 0.000014                  |     | 0.00157 ± 0.00007                    |     | 0.0568 ± 0.0017                      |     | 0.281692 ± 0.000028                     |     | -1.8 ± 0.8          |     | n3604ox-09a | 7.5               |
| A1360-10a | 1636                 | 0.281772 ± 0.000023                  |     | 0.00124 ± 0.00008                    |     | 0.0520 ± 0.0011                      |     | 0.281734 ± 0.000046                     |     | -0.3 ± 1.5          |     | n3604ox-10a | 7.8               |
| A1360-10b | 1636                 | 0.281772 ± 0.000023                  |     | 0.00151 ± 0.00003                    |     | 0.0485 ± 0.0010                      |     | 0.281725 ± 0.000046                     |     | -0.6 ± 1.6          |     | n3604ox-10b | 8.6               |
| A1360-11  | 1636                 | 0.281747 ± 0.000025                  |     | 0.00110 ± 0.00010                    |     | 0.0488 ± 0.0025                      |     | 0.281713 ± 0.000050                     |     | -1.1 ± 1.6          |     | n3604ox-11  | 8.1               |
| A1360-12  | 1636                 | 0.281764 ± 0.000020                  |     | 0.00068 ± 0.00003                    |     | 0.0358 ± 0.0005                      |     | 0.281743 ± 0.000040                     |     | 0.0 ± 1.3           |     | n3604ox-12  | 8.3               |
| A1360-01  |                      |                                      |     |                                      |     |                                      |     |                                         |     |                     |     | n3604ox-01  | 7.7               |
| A1360-02b |                      |                                      |     |                                      |     |                                      |     |                                         |     |                     |     | n3604ox-02b | 7.4               |
| A1360-08  |                      |                                      |     |                                      |     |                                      |     |                                         |     |                     |     | n3604ox-08  | 8.1               |
| A1360-09b |                      |                                      |     |                                      |     |                                      |     |                                         |     |                     |     | n3604ox-09b | 7.9               |

<sup>a</sup>Age used in calculation of <sup>176</sup>Hf/<sup>177</sup>Hf(t) and ε<sub>Hf</sub>(t) (Alviola *et al.* 1999; Heinonen *et al.* 2010).

#### References cited:

ALVIOLA, R., JOHANSON, B.S., RÄMÖ, O.T. & VAASJOKI, M. 1999. The Proterozoic Ahvenisto rapakivi-massif-type anorthosite complex, southeastern Finland; petrography and U-Pb chronology. *Precambrian Research*, **95**, 89–107.

HEINONEN, A.P., RÄMÖ, O.T., MÄNTTÄRI, I., JOHANSON, B. & ALVIOLA, R. 2010. Formation and fractionation of high-Al tholeiitic magmas in the Ahvenisto rapakivi granite-massif-type anorthosite complex, south-eastern Finland. *Canadian Mineralogist*, **48**, 969–990.
