# Supplementary material
Source: publisher figshare collection journal article supplement (https://geolsoc.figshare.com/articles/dataset/_/3453818)
Supplement: Supplementary file 3 [file 1]

## Appendix A. Analytical details for the SIMS oxygen isotope analysis.

| Sample ID & spot # | Sequence in session | Drift corrected<br>$^{18}\text{O}/^{16}\text{O}^*$ | Samples<br>$\delta^{18}\text{O}$ (‰) | Standards<br>$\delta^{18}\text{O}$ (‰) | Stage position |       | Field aperture centering |     |  |
|--------------------|---------------------|----------------------------------------------------|--------------------------------------|----------------------------------------|----------------|-------|--------------------------|-----|--|
|                    |                     |                                                    |                                      |                                        | x              | y     | X                        | Y   |  |
| Session 1          |                     |                                                    |                                      |                                        |                |       |                          |     |  |
| 915ox_857_@25      | 1                   | 0.00200914 ± 31                                    |                                      | 9.78 ± 0.28                            | -3998          | 562   | -15                      | 1   |  |
| 915ox_857_@26      | 2                   | 0.00200906 ± 38                                    |                                      | 9.74 ± 0.30                            | -3998          | 502   | -20                      | 0   |  |
| n3602ox-01         | 3                   | 0.00200158 ± 20                                    | 5.98 ± 0.25                          |                                        | 2190           | -2126 | 54                       | -7  |  |
| n3602ox-02         | 4                   | 0.00200101 ± 22                                    | 5.69 ± 0.25                          |                                        | 1849           | -2049 | 43                       | -9  |  |
| n3602ox-03         | 5                   | 0.00200162 ± 36                                    | 6.00 ± 0.29                          |                                        | 1634           | -2092 | 43                       | -9  |  |
| n3602ox-04         | 6                   | 0.00200156 ± 32                                    | 5.97 ± 0.28                          |                                        | 1457           | -2153 | 43                       | -10 |  |
| 915ox_857_@27      | 7                   | 0.00200999 ± 41                                    |                                      | 10.20 ± 0.31                           | -3998          | 442   | -21                      | 1   |  |
| 915ox_857_@28      | 8                   | 0.00200909 ± 38                                    |                                      | 9.75 ± 0.30                            | -3998          | 382   | -21                      | 0   |  |
| n3602ox-05         | 9                   | 0.00200087 ± 22                                    | 5.62 ± 0.25                          |                                        | 897            | -2230 | 37                       | -9  |  |
| n3602ox-06         | 10                  | 0.00200119 ± 24                                    | 5.78 ± 0.26                          |                                        | 558            | -2077 | 34                       | -11 |  |
| n3602ox-07         | 11                  | 0.00200035 ± 30                                    | 5.36 ± 0.27                          |                                        | 210            | -2197 | 30                       | -13 |  |
| n3602ox-08         | 12                  | 0.00200035 ± 31                                    | 5.36 ± 0.28                          |                                        | -241           | -2126 | 25                       | -12 |  |
| 915ox_857_@29      | 13                  | 0.00200991 ± 34                                    |                                      | 10.17 ± 0.29                           | -4058          | 442   | -21                      | 0   |  |
| 915ox_857_@30      | 14                  | 0.00200933 ± 34                                    |                                      | 9.87 ± 0.28                            | -4058          | 502   | -17                      | -1  |  |
| n3602ox-09         | 15                  | 0.00200276 ± 40                                    | 6.57 ± 0.30                          |                                        | -554           | -2124 | 18                       | -14 |  |
| n3602ox-10         | 16                  | 0.00200089 ± 27                                    | 5.63 ± 0.26                          |                                        | -772           | -2237 | 19                       | -15 |  |
| n3602ox-11         | 17                  | 0.00200156 ± 36                                    | 5.97 ± 0.29                          |                                        | -1115          | -2116 | 13                       | -14 |  |
| n3602ox-12         | 18                  | 0.00200134 ± 29                                    | 5.86 ± 0.27                          |                                        | -1472          | -2091 | 10                       | -14 |  |
| 915ox_857_@31      | 19                  | 0.00200963 ± 24                                    |                                      | 10.02 ± 0.26                           | -4058          | 562   | -19                      | -1  |  |
| 915ox_857_@32      | 20                  | 0.00200956 ± 23                                    |                                      | 9.99 ± 0.26                            | -4058          | 622   | -16                      | -1  |  |
| n3602ox-13a        | 21                  | 0.00200112 ± 28                                    | 5.75 ± 0.27                          |                                        | -1632          | -2182 | 9                        | -13 |  |
| n3602ox-13b        | 22                  | 0.00200358 ± 27                                    | 6.98 ± 0.27                          |                                        | -1688          | -2223 | 10                       | -12 |  |
| n3602ox-14         | 23                  | 0.00200252 ± 32                                    | 6.45 ± 0.28                          |                                        | -1799          | -2274 | 8                        | -12 |  |
| n3603ox-01         | 24                  | 0.00200294 ± 37                                    | 6.66 ± 0.29                          |                                        | 1966           | -1616 | 46                       | -6  |  |
| 915ox_857_@33      | 25                  | 0.00201056 ± 41                                    |                                      | 10.49 ± 0.31                           | -4118          | 682   | -13                      | -2  |  |
| 915ox_857_@34      | 26                  | 0.00201121 ± 41                                    |                                      | 10.82 ± 0.31                           | -4118          | 622   | -15                      | 0   |  |
| n3603ox-02         | 27                  | 0.00200339 ± 33                                    | 6.89 ± 0.28                          |                                        | 1761           | -1606 | 42                       | -7  |  |
| n3603ox-03         | 28                  | 0.00200453 ± 26                                    | 7.46 ± 0.26                          |                                        | 1496           | -1504 | 41                       | -5  |  |
| n3603ox-04         | 29                  | 0.00200453 ± 28                                    | 7.46 ± 0.27                          |                                        | 1111           | -1499 | 34                       | -8  |  |
| n3603ox-05         | 30                  | 0.00200480 ± 50                                    | 7.60 ± 0.34                          |                                        | 878            | -1482 | 33                       | -11 |  |
| 915ox_857_@35      | 31                  | 0.00201119 ± 30                                    |                                      | 10.81 ± 0.27                           | -4118          | 562   | -19                      | 0   |  |
| 915ox_857_@36      | 32                  | 0.00200912 ± 28                                    |                                      | 9.77 ± 0.27                            | -4118          | 502   | -19                      | 1   |  |
| n3603ox-06         | 33                  | 0.00200354 ± 42                                    | 6.97 ± 0.31                          |                                        | 606            | -1493 | 30                       | -9  |  |
| n3603ox-07         | 34                  | 0.00200350 ± 26                                    | 6.95 ± 0.26                          |                                        | 420            | -1600 | 27                       | -12 |  |
| n3603ox-08         | 35                  | 0.00200432 ± 33                                    | 7.35 ± 0.28                          |                                        | 182            | -1562 | 24                       | -12 |  |
| n3603ox-09         | 36                  | 0.00200396 ± 36                                    | 7.18 ± 0.29                          |                                        | -104           | -1608 | 26                       | -11 |  |
| 915ox_857_@37      | 37                  | 0.00200972 ± 26                                    |                                      | 10.07 ± 0.26                           | -4118          | 442   | -22                      | 1   |  |
| 915ox_857_@38      | 38                  | 0.00200968 ± 40                                    |                                      | 10.05 ± 0.30                           | -4118          | 382   | -21                      | 0   |  |
| n3603ox-10         | 39                  | 0.00200462 ± 40                                    | 7.51 ± 0.30                          |                                        | -406           | -1619 | 21                       | -10 |  |
| n3603ox-11         | 40                  | 0.00200268 ± 37                                    | 6.53 ± 0.29                          |                                        | -527           | -1561 | 18                       | -11 |  |
| n3603ox-12         | 41                  | 0.00200443 ± 28                                    | 7.41 ± 0.27                          |                                        | -600           | -1521 | 17                       | -10 |  |
| n3603ox-13         | 42                  | 0.00200520 ± 32                                    | 7.80 ± 0.28                          |                                        | -916           | -1551 | 16                       | -9  |  |
| 915ox_857_@39      | 43                  | 0.00200916 ± 35                                    |                                      | 9.79 ± 0.29                            | -4178          | 382   | -21                      | 0   |  |
| 915ox_857_@40      | 44                  | 0.00200934 ± 29                                    |                                      | 9.88 ± 0.27                            | -4178          | 442   | -19                      | 1   |  |
| n3603ox-14         | 45                  | 0.00200501 ± 34                                    | 7.70 ± 0.28                          |                                        | -1061          | -1559 | 13                       | -11 |  |
| n3603ox-15         | 46                  | 0.00200372 ± 37                                    | 7.06 ± 0.29                          |                                        | -1323          | -1514 | 11                       | -11 |  |
| n3603ox-16         | 47                  | 0.00200316 ± 42                                    | 6.78 ± 0.31                          |                                        | -1623          | -1618 | 10                       | -10 |  |

| Sample ID & spot #  | Sequence in session | Drift corrected<br>$^{18}\text{O}/^{16}\text{O}^*$ | Samples<br>$\delta^{18}\text{O}$ (‰) | Standards<br>$\delta^{18}\text{O}$ (‰) | Stage position |       | Field aperture centering |    |  |
|---------------------|---------------------|----------------------------------------------------|--------------------------------------|----------------------------------------|----------------|-------|--------------------------|----|--|
|                     |                     |                                                    |                                      |                                        | x              | y     | X                        | Y  |  |
| Session 1 continued |                     |                                                    |                                      |                                        |                |       |                          |    |  |
| n3604ox-01          | 48                  | 0.00200503 ± 33                                    | 7.71 ± 0.28                          |                                        | 1509           | -1042 | 38                       | -6 |  |
| 915ox_857_@41       | 49                  | 0.00201117 ± 33                                    |                                      | 10.80 ± 0.28                           | -4178          | 502   | -19                      | 2  |  |
| 915ox_857_@42       | 50                  | 0.00201258 ± 48                                    |                                      | 11.51 ± 0.33                           | -4178          | 562   | -15                      | 3  |  |
| n3604ox-02a         | 51                  | 0.00200524 ± 38                                    | 7.82 ± 0.30                          |                                        | 1106           | -992  | 34                       | -5 |  |
| n3604ox-02b         | 52                  | 0.00200440 ± 38                                    | 7.40 ± 0.30                          |                                        | 1119           | -1028 | 34                       | -7 |  |
| n3604ox-03a         | 53                  | 0.00200606 ± 36                                    | 8.23 ± 0.29                          |                                        | 870            | -894  | 32                       | -5 |  |
| n3604ox-03b         | 54                  | 0.00200433 ± 43                                    | 7.36 ± 0.31                          |                                        | 912            | -857  | 32                       | -4 |  |
| 915ox_857_@43       | 55                  | 0.00201121 ± 46                                    |                                      | 10.82 ± 0.32                           | -4238          | 382   | -18                      | 3  |  |
| 915ox_857_@44       | 56                  | 0.00200978 ± 40                                    |                                      | 10.10 ± 0.30                           | -4456          | -419  | -23                      | -4 |  |
| n3604ox-04          | 57                  | 0.00200556 ± 28                                    | 7.98 ± 0.27                          |                                        | 586            | -1002 | 28                       | -6 |  |
| n3604ox-05          | 58                  | 0.00200541 ± 24                                    | 7.91 ± 0.26                          |                                        | 439            | -1009 | 27                       | -6 |  |
| n3604ox-06          | 59                  | 0.00200485 ± 27                                    | 7.62 ± 0.27                          |                                        | -172           | -888  | 25                       | -5 |  |
| n3604ox-07          | 60                  | 0.00200506 ± 35                                    | 7.73 ± 0.29                          |                                        | -235           | -1073 | 22                       | -7 |  |
| 915ox_857_@45       | 61                  | 0.00200945 ± 53                                    |                                      | 9.93 ± 0.35                            | -4516          | -419  | -22                      | -4 |  |
| 915ox_857_@46       | 62                  | 0.00200841 ± 34                                    |                                      | 9.41 ± 0.28                            | -4516          | -479  | -23                      | -5 |  |
| n3604ox-08          | 63                  | 0.00200586 ± 34                                    | 8.13 ± 0.28                          |                                        | -617           | -988  | 19                       | -6 |  |
| n3604ox-09a         | 64                  | 0.00200463 ± 46                                    | 7.51 ± 0.32                          |                                        | -898           | -959  | 14                       | -6 |  |
| n3604ox-09b         | 65                  | 0.00200535 ± 31                                    | 7.87 ± 0.27                          |                                        | -904           | -1004 | 15                       | -4 |  |
| n3604ox-10a         | 66                  | 0.00200510 ± 36                                    | 7.75 ± 0.29                          |                                        | -972           | -987  | 13                       | -8 |  |
| 915ox_857_@47       | 67                  | 0.00200825 ± 39                                    |                                      | 9.33 ± 0.30                            | -4576          | -599  | -23                      | -8 |  |
| 915ox_857_@48       | 68                  | 0.00200847 ± 37                                    |                                      | 9.44 ± 0.29                            | -4576          | -539  | -23                      | -9 |  |
| n3604ox-10b         | 69                  | 0.00200675 ± 50                                    | 8.58 ± 0.34                          |                                        | -1005          | -958  | 14                       | -7 |  |
| n3604ox-11          | 70                  | 0.00200571 ± 34                                    | 8.05 ± 0.28                          |                                        | -1709          | -1069 | 10                       | -6 |  |
| n3604ox-12          | 71                  | 0.00200627 ± 23                                    | 8.34 ± 0.26                          |                                        | -1731          | -890  | 9                        | -5 |  |
| n3605ox-01          | 72                  | 0.00200356 ± 33                                    | 6.97 ± 0.28                          |                                        | 1989           | -543  | 43                       | -1 |  |
| 915ox_857_@49       | 73                  | 0.00200880 ± 49                                    |                                      | 9.61 ± 0.33                            | -4576          | -479  | -23                      | -8 |  |
| 915ox_857_@50       | 74                  | 0.00200905 ± 48                                    |                                      | 9.73 ± 0.33                            | -4576          | -419  | -24                      | -6 |  |
| n3605ox-02          | 75                  | 0.00200375 ± 32                                    | 7.07 ± 0.28                          |                                        | 1882           | -548  | 41                       | -2 |  |
| n3605ox-03          | 76                  | 0.00200411 ± 38                                    | 7.25 ± 0.30                          |                                        | 1691           | -530  | 39                       | -1 |  |
| n3605ox-04          | 77                  | 0.00200349 ± 41                                    | 6.94 ± 0.30                          |                                        | 1468           | -490  | 39                       | -3 |  |
| n3605ox-05          | 78                  | 0.00200330 ± 27                                    | 6.84 ± 0.27                          |                                        | 1325           | -496  | 34                       | -4 |  |
| 915ox_857_@51       | 79                  | 0.00200944 ± 42                                    |                                      | 9.93 ± 0.31                            | -4576          | -359  | -25                      | -6 |  |
| 915ox_857_@52       | 80                  | 0.00201107 ± 32                                    |                                      | 10.75 ± 0.28                           | -4636          | -299  | -23                      | -4 |  |
| n3605ox-06          | 81                  | 0.00200283 ± 31                                    | 6.61 ± 0.27                          |                                        | 1149           | -457  | 32                       | -4 |  |
| n3605ox-07          | 82                  | 0.00200478 ± 45                                    | 7.59 ± 0.32                          |                                        | 1097           | -426  | 31                       | -4 |  |
| n3605ox-08          | 83                  | 0.00200345 ± 37                                    | 6.92 ± 0.29                          |                                        | 740            | -517  | 28                       | -6 |  |
| n3605ox-09          | 84                  | 0.00200411 ± 33                                    | 7.25 ± 0.28                          |                                        | 422            | -451  | 23                       | -4 |  |
| 915ox_857_@53       | 85                  | 0.00200981 ± 53                                    |                                      | 10.11 ± 0.35                           | -4636          | -359  | -23                      | -6 |  |
| 915ox_857_@54       | 86                  | 0.00200891 ± 31                                    |                                      | 9.66 ± 0.28                            | -4636          | -419  | -23                      | -5 |  |
| n3605ox-10          | 87                  | 0.00200386 ± 25                                    | 7.12 ± 0.26                          |                                        | 348            | -537  | 26                       | -3 |  |
| n3605ox-11          | 88                  | 0.00200440 ± 30                                    | 7.40 ± 0.27                          |                                        | 132            | -561  | 24                       | -4 |  |
| n3605ox-12          | 89                  | 0.00200465 ± 46                                    | 7.52 ± 0.32                          |                                        | -280           | -501  | 20                       | -4 |  |
| n3605ox-13          | 90                  | 0.00200469 ± 22                                    | 7.54 ± 0.25                          |                                        | -425           | -458  | 19                       | -4 |  |
| 915ox_857_@55       | 91                  | 0.00200867 ± 47                                    |                                      | 9.54 ± 0.33                            | -4636          | -479  | -24                      | -7 |  |
| 915ox_857_@56       | 92                  | 0.00200864 ± 34                                    |                                      | 9.53 ± 0.28                            | -4636          | -539  | -20                      | -7 |  |
| n3605ox-14          | 93                  | 0.00200320 ± 44                                    | 6.79 ± 0.32                          |                                        | -553           | -508  | 16                       | -4 |  |
| n3605ox-15          | 94                  | 0.00200412 ± 34                                    | 7.26 ± 0.28                          |                                        | -1305          | -391  | 11                       | -4 |  |
| n3605ox-16          | 95                  | 0.00200343 ± 36                                    | 6.91 ± 0.29                          |                                        | -1448          | -353  | 9                        | -5 |  |

| Sample ID & spot #   | Sequence in session | Drift corrected $^{18}\text{O}/^{16}\text{O}^*$ | Samples $\delta^{18}\text{O}$ (‰) | Standards $\delta^{18}\text{O}$ (‰) | Stage position |             | Field aperture centering |           |  |
|----------------------|---------------------|-------------------------------------------------|-----------------------------------|-------------------------------------|----------------|-------------|--------------------------|-----------|--|
|                      |                     |                                                 |                                   |                                     | x              | y           | X                        | Y         |  |
| Session 1 continued  |                     |                                                 |                                   |                                     |                |             |                          |           |  |
| n3606ox-01           | 96                  | 0.00200389 ± 52                                 | 7.14 ± 0.34                       |                                     | 2498           | 70          | 47                       | 4         |  |
| 915ox_857_@57        | 97                  | 0.00200876 ± 40                                 |                                   | 9.59 ± 0.30                         | -4636          | -599        | -21                      | -8        |  |
| 915ox_857_@58        | 98                  | 0.00200851 ± 42                                 |                                   | 9.46 ± 0.31                         | -4696          | -419        | -23                      | -4        |  |
| n3606ox-02           | 99                  | 0.00200302 ± 41                                 | 6.70 ± 0.30                       |                                     | 2245           | -11         | 44                       | 1         |  |
| n3606ox-03           | 100                 | 0.00200229 ± 37                                 | 6.34 ± 0.29                       |                                     | 1717           | -11         | 40                       | -2        |  |
| n3606ox-04           | 101                 | 0.00200359 ± 22                                 | 6.99 ± 0.25                       |                                     | 996            | 189         | 29                       | 0         |  |
| n3606ox-05           | 102                 | 0.00200359 ± 35                                 | 6.99 ± 0.29                       |                                     | 707            | 188         | 28                       | 1         |  |
| 915ox_857_@59        | 103                 | 0.00200963 ± 43                                 |                                   | 10.03 ± 0.31                        | -4696          | -359        | -24                      | -6        |  |
| <i>915ox_857_@60</i> | <i>104</i>          | <i>0.00201033 ± 42</i>                          |                                   | <i>10.38 ± 0.31</i>                 | <i>-4756</i>   | <i>-359</i> | <i>-22</i>               | <i>-5</i> |  |
| n3606ox-06           | 105                 | 0.00200367 ± 31                                 | 7.03 ± 0.27                       |                                     | 467            | 217         | 25                       | 2         |  |
| n3606ox-07           | 106                 | 0.00200325 ± 44                                 | 6.82 ± 0.32                       |                                     | 469            | -5          | 26                       | 0         |  |
| n3606ox-08           | 107                 | 0.00200390 ± 32                                 | 7.15 ± 0.28                       |                                     | 7              | 324         | 23                       | 5         |  |
| n3606ox-09           | 108                 | 0.00200379 ± 30                                 | 7.09 ± 0.27                       |                                     | -198           | 66          | 21                       | 0         |  |
| 915ox_857_@61        | 109                 | 0.00200969 ± 47                                 |                                   | 10.05 ± 0.33                        | -4756          | -419        | -24                      | -4        |  |
| 915ox_857_@62        | 110                 | 0.00200945 ± 56                                 |                                   | 9.94 ± 0.36                         | -4756          | -479        | -24                      | -7        |  |
| n3606ox-10           | 111                 | 0.00200296 ± 54                                 | 6.67 ± 0.35                       |                                     | -318           | 352         | 19                       | 3         |  |
| n3606ox-11           | 112                 | 0.00200349 ± 33                                 | 6.94 ± 0.28                       |                                     | -394           | 247         | 18                       | 2         |  |
| n3606ox-12           | 113                 | 0.00200394 ± 46                                 | 7.16 ± 0.32                       |                                     | -544           | 279         | 16                       | 0         |  |
| n3606ox-13           | 114                 | 0.00200280 ± 28                                 | 6.59 ± 0.27                       |                                     | -910           | 336         | 14                       | 4         |  |
| 915ox_857_@63        | 115                 | 0.00200982 ± 43                                 |                                   | 10.12 ± 0.31                        | -4903          | -606        | -25                      | -5        |  |
| 915ox_857_@64        | 116                 | 0.00200892 ± 46                                 |                                   | 9.67 ± 0.32                         | -4934          | -650        | -25                      | -6        |  |
| n3606ox-14           | 117                 | 0.00200276 ± 46                                 | 6.57 ± 0.32                       |                                     | -1400          | 294         | 11                       | 0         |  |
| n3606ox-15           | 118                 | 0.00200307 ± 35                                 | 6.73 ± 0.29                       |                                     | -1526          | 205         | 10                       | -1        |  |
| n3606ox-16           | 119                 | 0.00200369 ± 48                                 | 7.04 ± 0.33                       |                                     | -1689          | 292         | 8                        | 0         |  |
| 915ox_857_@65        | 121                 | 0.00200986 ± 50                                 |                                   | 10.14 ± 0.34                        | -4994          | -691        | -24                      | -5        |  |
| 915ox_857_@66        | 122                 | 0.00200892 ± 27                                 |                                   | 9.67 ± 0.27                         | -4919          | 30          | -23                      | -5        |  |
| Session 2            |                     |                                                 |                                   |                                     |                |             |                          |           |  |
| 915ox_857_@87        | 31                  | 0.00201003 ± 37                                 |                                   | 9.97 ± 0.35                         | -5061          | -1646       | -37                      | -12       |  |
| <i>915ox_857_@88</i> | <i>32</i>           | <i>0.00201113 ± 27</i>                          |                                   | <i>10.52 ± 0.32</i>                 | <i>-5319</i>   | <i>677</i>  | <i>-38</i>               | <i>-7</i> |  |
| n3603ox-17           | 33                  | 0.00200394 ± 32                                 | 6.91 ± 0.33                       |                                     | 996            | -1500       | 19                       | -10       |  |
| n3603ox-18           | 34                  | 0.00200470 ± 34                                 | 7.29 ± 0.34                       |                                     | 124            | -1521       | 10                       | -13       |  |
| n3603ox-19           | 35                  | 0.00200456 ± 22                                 | 7.22 ± 0.31                       |                                     | -1701          | -1542       | -7                       | -14       |  |
| n3603ox-20           | 36                  | 0.00200427 ± 25                                 | 7.07 ± 0.32                       |                                     | -1824          | -1645       | -8                       | -14       |  |
| 915ox_857_@89        | 37                  | 0.00200939 ± 33                                 |                                   | 9.65 ± 0.34                         | -5047          | 1620        | -41                      | -4        |  |
| 915ox_857_@90        | 38                  | 0.00200909 ± 19                                 |                                   | 9.50 ± 0.31                         | -4451          | 1914        | -35                      | 0         |  |

\*Absolute  $1\sigma$  error given at  $\times 10^8$ .

External  $1\sigma$  error of  $\delta^{18}\text{O}$  values was 0.17 ‰ in session 1 and 0.29 ‰ in session 2.

The applied drift correction (‰/run) was 0.002.

*Italics* denote rejected standard runs.

## Notes:

Samples are labeled according to the NORDSIM labfile system, n3602 corresponds to sample A1271, n3603 to A1933, n3604 to A1360, n3605 to A1306 and n3606 to A118.

Analyses were performed at the same time with samples from other projects, which accounts for the missing sample numbers in the end of session 1 and at the beginning of session 2 sequence.
